# Supplementary material
Source: publisher figshare collection journal article supplement (https://acs.figshare.com/ndownloader/files/8277227)
Supplement: Supplementary file 1 [file 8277227]

## ***SUPPORTING INFORMATION***

### **Selective Nitrate-to-Ammonia Transformation on Surface Defects of Titanium Dioxide Photocatalysts**

Hiroaki Hirakawa,<sup>†</sup> Masaki Hashimoto,<sup>†</sup> Yasuhiro Shiraishi,<sup>\*,†,‡</sup> and Takayuki Hirai<sup>†</sup>

<sup>†</sup> Research Center for Solar Energy Chemistry, and Division of Chemical Engineering, Graduate School of Engineering Science, Osaka University, Toyonaka 560-8531, Japan

<sup>‡</sup> PRESTO, JST, Saitama 332-0012, Japan

E-mail: shiraish@cheng.es.osaka-u.ac.jp

## **CONTENTS**

|                                                                                                                   | page |
|-------------------------------------------------------------------------------------------------------------------|------|
| <b>Figure S1.</b> XRD patterns of the catalysts.....                                                              | 2    |
| <b>Figure S2.</b> DRIFT spectra of nitrobenzene adsorbed onto TiO <sub>2</sub> .....                              | 3    |
| <b>Figure S3.</b> DRIFT spectra of pyridine adsorbed onto TiO <sub>2</sub> .....                                  | 3    |
| <b>Figure S4.</b> ESR spectra of the reaction solutions with a Fe-DTCS probe.....                                 | 4    |
| <b>Table S1.</b> Results for photocatalytic NO <sub>3</sub> <sup>-</sup> reduction on metal-loaded catalysts..... | 4    |

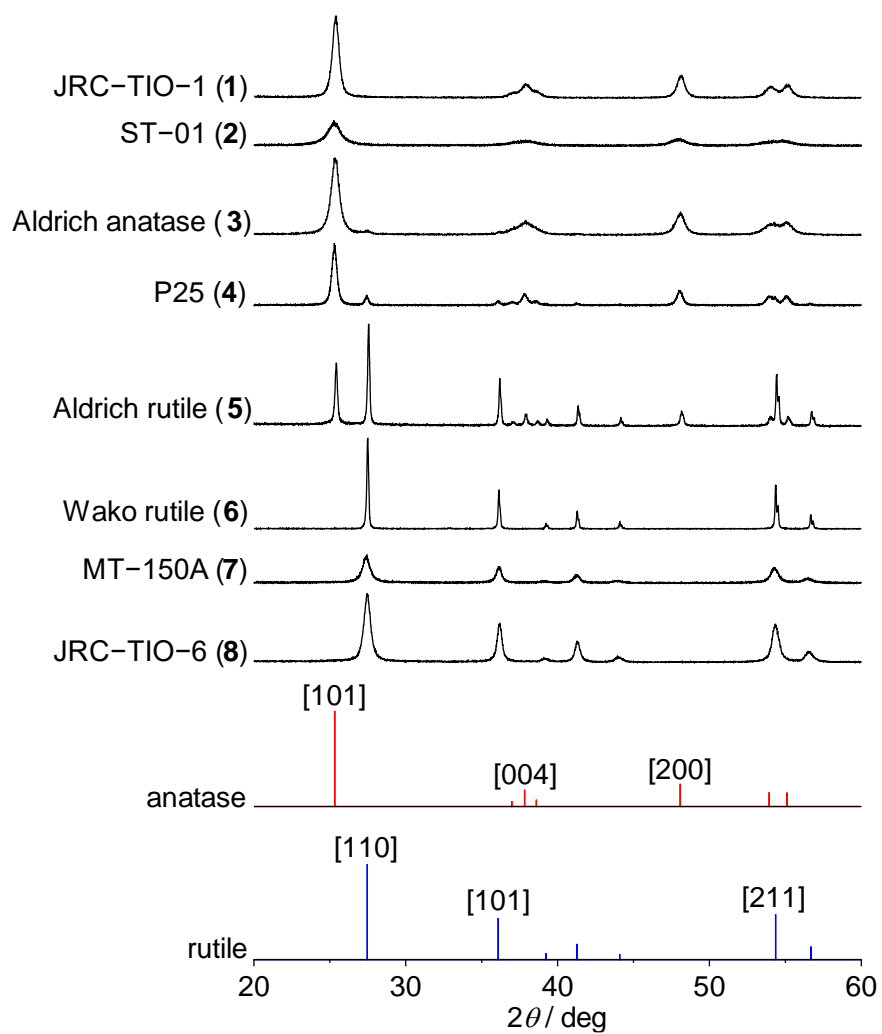

**Figure S1.** XRD patterns for respective  $\text{TiO}_2$  particles, and standard patterns for anatase (JCPDS 21-1272) and rutile  $\text{TiO}_2$  (JCPDS 21-1276). The number in parentheses denotes the sample number listed in Table 1 (manuscript).

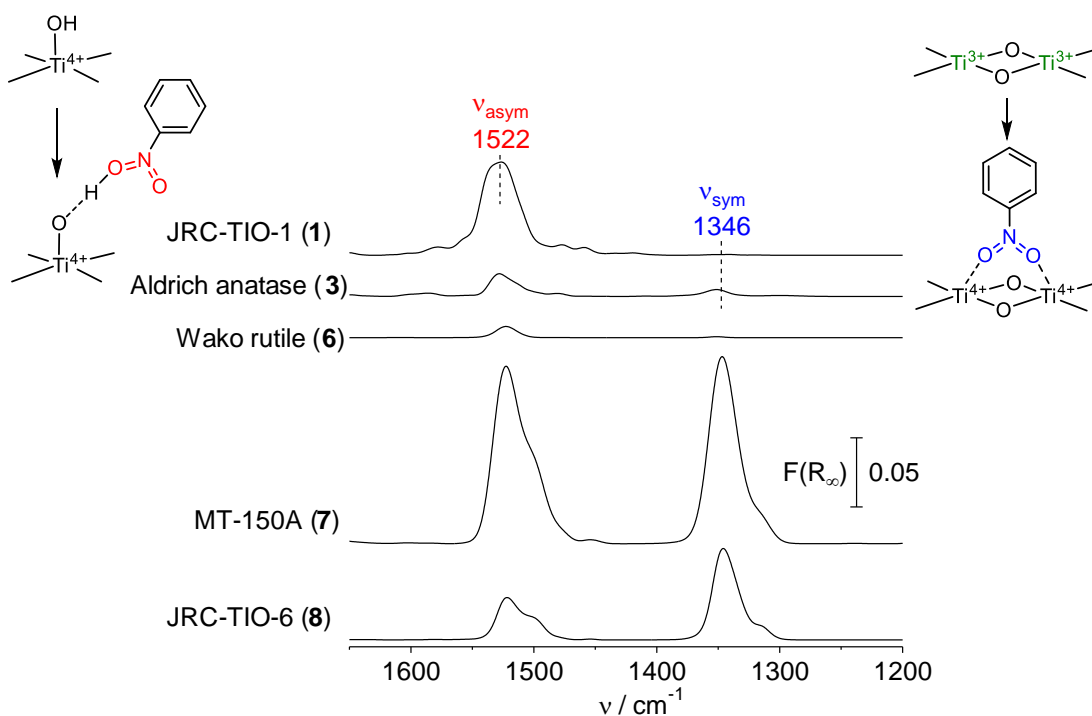

**Figure S2.** DRIFT spectra of nitrobenzene adsorbed onto the respective  $\text{TiO}_2$  particles in the gas phase at 303 K. The spectra were measured as follows:  $\text{TiO}_2$  (50 mg) were placed in a DR cell and evacuated (0.9 Pa) at 423 K for 3 h. Nitrobenzene (17  $\mu\text{mol}$ ) was introduced to the cell at 303 K and left for 1 h. The cell was then evacuated (0.9 Pa) for 1 h to remove the physically adsorbed nitrobenzene.

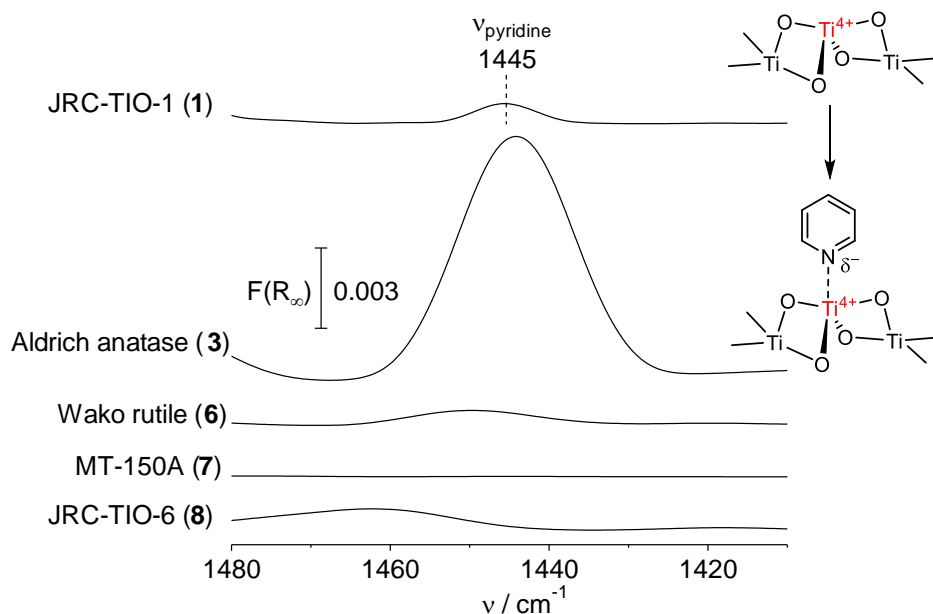

**Figure S3.** DRIFT spectra of pyridine adsorbed onto the respective  $\text{TiO}_2$  particles in the gas phase at 303 K. The spectra were measured as follows: a mixture of  $\text{TiO}_2$  (5 mg) and KBr (45 mg) were placed in a DR cell and evacuated (0.9 Pa) at 423 K for 3 h. Pyridine (21  $\mu\text{mol}$ ) was introduced to the cell at 303 K and left for 1 h. The cell was then evacuated (0.9 Pa) for 1 h to remove the physically adsorbed pyridine.

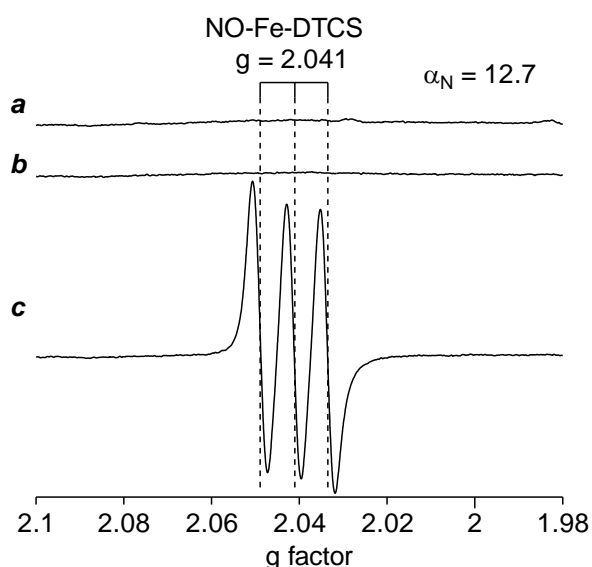

**Figure S4.** ESR spectra measured at 298 K for the solutions obtained by  $\lambda > 300$  nm light irradiation of (a) JRC-TIO-1 (**1**) and (b) JRC-TIO-6 TiO<sub>2</sub> (**8**) (10 mg) in a 2-PrOH/water mixture (5 wt % 2-PrOH, 2 mL) with Fe-DTCS (20  $\mu$ mol) for 3 min. (c) ESR spectrum measured at 298 K for the solution obtained under NO gas bubbling through a 2-PrOH/water mixture (5 wt % 2-PrOH, 2 mL) with Fe-DTCS (20  $\mu$ mol) for 3 min.

**Table S1.** Results for photocatalytic NO<sub>3</sub><sup>−</sup> reduction on JRC-TIO-6 (**8**) loaded with various metal particles.<sup>a</sup>

| entry | catalyst                                 | NO <sub>3</sub> <sup>−</sup> conv. / % | amount / $\mu$ mol |                                                 |                | NH <sub>3</sub> (NH <sub>4</sub> <sup>+</sup> ) select. / % |
|-------|------------------------------------------|----------------------------------------|--------------------|-------------------------------------------------|----------------|-------------------------------------------------------------|
|       |                                          |                                        | N <sub>2</sub>     | NH <sub>3</sub> (NH <sub>4</sub> <sup>+</sup> ) | H <sub>2</sub> |                                                             |
| 1     | JRC-TIO-6 ( <b>8</b> )                   | 79                                     | <0.1               | 38.4                                            | <0.1           | 97                                                          |
| 2     | Pt/JRC-TIO-6 ( <b>8</b> ) <sup>b</sup>   | 3                                      | <0.1               | 1.3                                             | 150.1          | 96                                                          |
| 3     | Au/JRC-TIO-6 ( <b>8</b> ) <sup>b</sup>   | 66                                     | 3.8                | 25.3                                            | 62.6           | 76                                                          |
| 4     | Ag/JRC-TIO-6 ( <b>8</b> ) <sup>b</sup>   | 89                                     | 4.5                | 25.5                                            | 2.3            | 57                                                          |
| 5     | Cu/JRC-TIO-6 ( <b>8</b> ) <sup>b</sup>   | 74                                     | 1.6                | 34.1                                            | 5.3            | 92                                                          |
| 6     | CuPd/JRC-TIO-6 ( <b>8</b> ) <sup>c</sup> | 44                                     | 1.7                | 18.6                                            | 255.9          | 85                                                          |

<sup>a</sup> Reaction conditions: KNO<sub>3</sub> (50  $\mu$ mol), water (50 mL), HCOOH (0.5 wt %, 5.4 mmol), catalyst (100 mg), Ar (1 atm), temperature (303 K),  $\lambda > 300$  nm irradiation by a 2 kW Xe lamp (light intensity at 300–450 nm, 30 W m<sup>−2</sup>), time (24 h). <sup>b</sup> Prepared by impregnation of metal precursors followed by H<sub>2</sub> reduction, where the metal loading [= M/TiO<sub>2</sub> × 100] is 0.37 wt %. <sup>c</sup> Prepared with a polyvinylpyrrolidone (PVP) template using NaBH<sub>4</sub> as a reductant, where the alloy particles consist of 0.14 wt % Cu and 0.23 wt % Pd.
